# Supplementary material for: The addition of echocardiographic parameters to PESI risk score improves mortality prediction in patients with acute pulmonary embolism: PESI-Echo score
Source: PubMed Central journal article supplement — Eur Heart J Acute Cardiovasc Care. 2020 Oct 14;10(3):250–7. doi: 10.1093/ehjacc/zuaa007 (PMC8241311; doi:10.1093/ehjacc/zuaa007), 2020-10-14
Supplement: zuaa007_supplementary_data.pdf [file zuaa007_supplementary_data.pdf]

**Supplementary material: Table 1**

| <b>Variable</b>                          | <b>PESI score</b> |
|------------------------------------------|-------------------|
| Age                                      | Age in years      |
| Male                                     | 10                |
| Malignancy                               | 30                |
| Chronic heart failure                    | 10                |
| Chronic Obstructive Pulmonary disease    | 10                |
| Heart rate $\geq$ 110/min                | 20                |
| Systolic blood pressure < 100 mm Hg      | 30                |
| Breathing frequency > 30/min             | 20                |
| Temperature < 36 °C                      | 20                |
| Alteration of the level of consciousness | 60                |
| Arterial oxygen saturation < 90 %        | 20                |

**Supplementary table 2: clinical characteristics of patients included**

| <b>Variable</b>                        | <b>Global cohort (n=684)</b> |
|----------------------------------------|------------------------------|
| <b>Clinical manifestations</b>         |                              |
| - Dyspnea                              | 582 (85.09%)                 |
| - Palpitations                         | 77 (11.26%)                  |
| - Angina                               | 61 (8.92%)                   |
| - Pleuritic pain                       | 100 (14.62%)                 |
| - Unilateral lower limb pain / edema   | 135 (19.74%)                 |
| - Tachycardia (> 100 bpm)              | 254 (37.35%)                 |
| - Arterial hypotension                 | 79 (11.55%)                  |
| - Tachypnea (> 20 cpm)                 | 309 (46.96%)                 |
| - Desaturation (SaO <sub>2</sub> <90%) | 167/667 (25.04%)             |
| <b>Electrocardiography</b>             |                              |
| - Sinus tachycardia                    | 354 (51.75%)                 |
| - Negative T wave in V1-V4             | 110 (16.08%)                 |
| - Atrial fibrillation / flutter        | 59 (8.63%)                   |
| - Complete right bundle branch block   | 68 (9.94%)                   |
| - S1Q3T3 pattern                       | 138 (20.18%)                 |
| <b>Laboratory</b>                      |                              |
| - Hematocrit (%)                       | 37.4 (±6.6)                  |
| - Creatinine (mg / dL)                 | 0.91 (0.72-1.2)              |
| - Arterial oxygen saturation           | 95 (RIC 91-97)               |

|                                                                                                                                                                                                                                                                                                                                                                                                                                                                                                                                                                                                                                                                                                                                                                                                                                                               |                                                                                                                                                                                                                                                                                  |
|---------------------------------------------------------------------------------------------------------------------------------------------------------------------------------------------------------------------------------------------------------------------------------------------------------------------------------------------------------------------------------------------------------------------------------------------------------------------------------------------------------------------------------------------------------------------------------------------------------------------------------------------------------------------------------------------------------------------------------------------------------------------------------------------------------------------------------------------------------------|----------------------------------------------------------------------------------------------------------------------------------------------------------------------------------------------------------------------------------------------------------------------------------|
| <ul style="list-style-type: none"> <li>- positive Troponin</li> <li>- positive D-dimer</li> <li>- positive BNP</li> <li>- positive NT-proBNP</li> </ul>                                                                                                                                                                                                                                                                                                                                                                                                                                                                                                                                                                                                                                                                                                       | <p>312/477 (65.41%)</p> <p>207/215 (96.28%)</p> <p>41/56 (73.21%)</p> <p>126/152 (82.89%)</p>                                                                                                                                                                                    |
| <p><b>Stratification</b></p> <p>PESI score</p> <ul style="list-style-type: none"> <li>- PESI Class I</li> <li>- PESI Class II</li> <li>- PESI Class III</li> <li>- PESI Class IV</li> <li>- PESI Class V</li> </ul> <p>PESIs score <math>\geq</math> 1</p> <p>ESC stratification:</p> <ul style="list-style-type: none"> <li>- Low risk</li> <li>- Low-risk intermediate</li> <li>- High-risk intermediate</li> <li>- High risk</li> </ul>                                                                                                                                                                                                                                                                                                                                                                                                                    | <p>107 (15.64%)</p> <p>173 (25.29%)</p> <p>178 (26.02%)</p> <p>106 (15.5%)</p> <p>120 (17.54%)</p> <p>505 (73.83%)</p> <p>164 (24.26%)</p> <p>232 (34.32%)</p> <p>178 (26.33%)</p> <p>102 (15.09%)</p>                                                                           |
| <p><b>Treatment</b></p> <ul style="list-style-type: none"> <li>- In hospital Anticoagulation <ul style="list-style-type: none"> <li>Low molecular weight heparins first</li> <li>Unfractionated heparins first</li> </ul> </li> <li>- Inferior vena cava filter</li> <li>- Pulmonary reperfusion <ul style="list-style-type: none"> <li>Time to reperfusion (day)</li> <li>High risk reperfused</li> <li>Intermediate-high risk reperfused</li> <li>Pharmacological reperfusion</li> <li>Endovascular reperfusion</li> </ul> </li> <li>- Hemodynamic Support <ul style="list-style-type: none"> <li>Inotropics use</li> <li>Vasopressors use</li> <li>Ventricular assistance use</li> </ul> </li> <li>- Respiratory Support <ul style="list-style-type: none"> <li>Non-invasive ventilation</li> <li>Mechanical respiratory assistance</li> </ul> </li> </ul> | <p>664 (97%)</p> <p>372 (56%)</p> <p>146 (22%)</p> <p>43 (6.2%)</p> <p>91 (13%)</p> <p>2 (RIC 1-5)</p> <p>50/102 (49%)</p> <p>29/178 (16%)</p> <p>76/91 (85%)</p> <p>14/91 (15%)</p> <p>73 (10.67%)</p> <p>58 (8.48%)</p> <p>17 (2.49%)</p> <p>42 (6.46%)</p> <p>75 (11.54%)</p> |
| <p><b>In hospital events</b></p> <ul style="list-style-type: none"> <li>- Recurrence of PE</li> <li>- Heart failure</li> <li>- Atrial fibrillation</li> <li>- Infection</li> <li>- BARC bleeding</li> </ul>                                                                                                                                                                                                                                                                                                                                                                                                                                                                                                                                                                                                                                                   | <p>14 (2.05%)</p> <p>51 (7.46%)</p> <p>24 (3.51%)</p> <p>79 (11.55%)</p>                                                                                                                                                                                                         |

|                                 |                |
|---------------------------------|----------------|
| Type I – II                     | 22 (3.22%)     |
| Type III                        | 25 (3.65%)     |
| Type IV                         | 1 (0.15%)      |
| Type V                          | 1 (0.15%)      |
| - Kidney dysfunction            | 101 (15%)      |
| - Death                         | 83 (12.13%)    |
| PE related                      | 42/83 (50.6%)  |
| Other non-cardiovascular causes | 25/83 (30.12%) |
| Cardiovascular cause            | 13/83 (15.66%) |
| Bleeding                        | 3/83 (3.62%)   |

PE: Pulmonary embolism; PESI: pulmonary embolism severity index; BNP: brain natriuretic peptide

### Supplementary table 3. Causes of death stratified by PESI-Echo Score

| Cause of death           | PESI-Echo score $\geq 128$ | PESI-Echo score $< 128$ |
|--------------------------|----------------------------|-------------------------|
| PE related               | 16 (51.6%)                 | 4 (50%)                 |
| Other non-cardiovascular | 5 (16.1%)                  | 4 (50%)                 |
| Other cardiovascular     | 9 (29%)                    | 0 (0%)                  |
| Bleeding                 | 1 (3.2%)                   | 0 (0%)                  |
| Total                    | 31                         | 8                       |

### Supplementary Figure 1: PESI-Echo Score

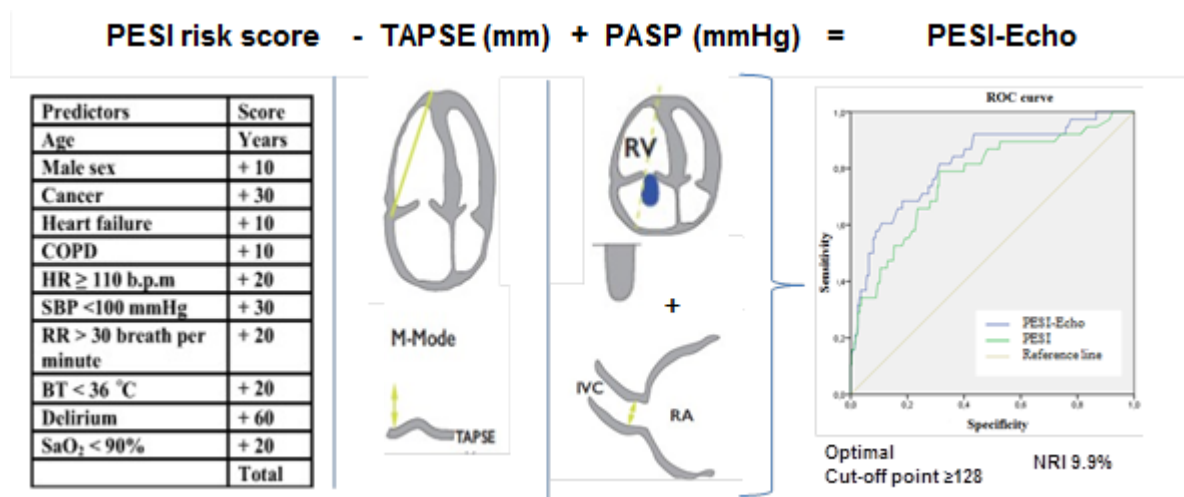

COPD: Chronic obstructive pulmonary disease. HR: Heart rate. SBP: Systolic blood pressure. RR: Respiratory rate. BT: Body temperature. PASP: pulmonary artery systolic pressure. TAPSE: tricuspid annular plane systolic excursion. RA: Right atrium. RV: Right ventricle. IVC: Inferior vena cava.
